# Supplementary material for: Carbapenem-resistance and pathogenicity of bovine Acinetobacter indicus-like isolates
Source: PLoS One. 2017 Feb 16;12(2):e0171986. doi: 10.1371/journal.pone.0171986 (PMC5313175; doi:10.1371/journal.pone.0171986)
Supplement: S2 Table — Colour shading indicates SNP values (low number of SNPs [dark green] to high number of SNPs [white]). (XLSX) [file pone.0171986.s002.xlsx]

## Sheet: SNP_matrix Figure S1A
Klotz et al.: "Carbapenem-resistance and pathogenicity of bovine Acinetobacter indicus-like isolates"
S2 (A) Table: SNP matrix referring to S1 (A) Fig
Strains (see S1 Fig for accession numbers)	A. baumannii AB 030	A. bohemicus ANC 3994	A. parvus CIP 108168	A. gerneri CIP 107464	A. schindleri CIP 107287	A. soli NIPH 2899	A. towneri CIP 107472	A. ursingii CIP 107286	A. bouvetii CIP 107468	A. radioresistens CIP 103788	A. bereziniae CIP 7012	A. beijerinckii CIP 110307	A. tandoii CIP 107469	A. lwoffii ATCC 15309	A. baumannii ATCC 17978	A. indicus ANC 4215	A. rudis CIP 110305	A. gyllenbergii NIPH 230	A. nectaris CIP 110549	A. indicus CIP 110367	A. brisouii CIP 110357	A. baumannii AYE	A. indicus DSM 25388	A. pittii BBST01.1	A. indicus IHIT27599	A. indicus IHIT27630	A. harbinensis HITLi7	A. indicus KM7	A. baumannii MDR-TJ	A. venetianus VE-C3	A. johnsonnii XBB1	A. equi strain 114
A. baumannii AB 030		2936	2533	2705	3066	2645	2820	2675	3328	3014	2821	2423	2769	3148	108	2911	2963	2308	3242	2911	2686	119	2911	1233	2918	2920	3294	2917	80	2267	2860	2977
A. bohemicus ANC 3994	2936		3006	2758	2654	3120	2451	3102	2699	3187	2543	2840	2499	2459	2918	2615	2998	2799	3576	2615	2855	2895	2615	2908	2634	2631	2019	2636	2918	2857	2214	2657
A. parvus CIP 108168	2533	3006		3017	3166	2858	2880	2814	3414	3213	2905	1908	2869	3139	2546	2962	3207	1796	3575	2962	2924	2519	2962	2495	2954	2954	3378	2965	2531	1825	2913	3225
A. gerneri CIP 107464	2705	2758	3017		3023	3040	2715	2976	3130	3219	2472	2891	2755	3032	2697	2901	2907	2853	3498	2901	2931	2679	2901	2723	2913	2923	3162	2930	2695	2808	2744	2851
A. schindleri CIP 107287	3066	2654	3166	3023		3226	2505	3268	2619	3152	2754	3206	2546	2216	3053	2327	3256	3008	3834	2327	3095	3037	2327	3105	2343	2341	3112	2317	3057	3096	2357	2602
A. soli NIPH 2899	2645	3120	2858	3040	3226		3008	2511	3444	3096	3095	2823	3013	3168	2629	2981	3142	2709	3448	2981	2897	2621	2981	2586	2994	3011	3387	2987	2632	2792	3145	3321
A. towneri CIP 107472	2820	2451	2880	2715	2505	3008		2989	2844	3135	2608	2899	2287	2472	2823	2222	3012	2736	3516	2222	2867	2801	2222	2878	2235	2223	2851	2240	2820	2790	2310	2554
A. ursingii CIP 107286	2675	3102	2814	2976	3268	2511	2989		3481	3072	2970	2759	2950	3203	2673	3022	3081	2692	3517	3022	2860	2658	3022	2639	3002	3025	3311	3019	2669	2755	3056	3290
A. bouvetii CIP 107468	3328	2699	3414	3130	2619	3444	2844	3481		3424	2912	3428	2767	2683	3331	2778	3423	3243	4049	2778	3279	3325	2778	3337	2810	2803	3132	2784	3336	3376	2463	2951
A. radioresistens CIP 103788	3014	3187	3213	3219	3152	3096	3135	3072	3424		3229	3247	3126	3120	3016	3001	3313	3130	3737	3001	3103	3001	3001	2993	3005	3019	3405	2964	3021	3144	3171	3376
A. bereziniae CIP 7012	2821	2543	2905	2472	2754	3095	2608	2970	2912	3229		2810	2531	2768	2813	2769	2784	2766	3452	2769	2879	2795	2769	2780	2781	2792	2957	2791	2817	2824	2474	2617
A. beijerinckii CIP 110307	2423	2840	1908	2891	3206	2823	2899	2759	3428	3247	2810		2781	3177	2423	3056	3061	1664	3417	3056	2881	2405	3056	2379	3045	3051	3229	3056	2419	1710	2840	2984
A. tandoii CIP 107469	2769	2499	2869	2755	2546	3013	2287	2950	2767	3126	2531	2781		2632	2778	2381	2925	2656	3483	2381	2814	2757	2381	2756	2394	2403	2899	2411	2768	2690	2147	2513
A. lwoffii ATCC 15309	3148	2459	3139	3032	2216	3168	2472	3203	2683	3120	2768	3177	2632		3143	2398	3240	2972	3827	2398	3085	3121	2398	3146	2411	2408	2808	2407	3149	3114	2356	2689
A. baumannii ATCC 17978	108	2918	2546	2697	3053	2629	2823	2673	3331	3016	2813	2423	2778	3143		2898	2963	2322	3226	2898	2698	117	2898	1230	2904	2908	3269	2901	87	2271	2855	2964
A. indicus ANC 4215	2911	2615	2962	2901	2327	2981	2222	3022	2778	3001	2769	3056	2381	2398	2898		3134	2860	3766	0	2895	2888	0	2960	184	210	2988	293	2902	2965	2388	2676
A. rudis CIP 110305	2963	2998	3207	2907	3256	3142	3012	3081	3423	3313	2784	3061	2925	3240	2963	3134		3007	3567	3134	3114	2944	3134	2990	3138	3156	3313	3131	2967	3004	3049	3154
A. gyllenbergii NIPH 230	2308	2799	1796	2853	3008	2709	2736	2692	3243	3130	2766	1664	2656	2972	2322	2860	3007		3407	2860	2798	2298	2860	2261	2858	2856	3152	2882	2309	1414	2659	2962
A. nectaris CIP 110549	3242	3576	3575	3498	3834	3448	3516	3517	4049	3737	3452	3417	3483	3827	3226	3766	3567	3407		3766	3306	3210	3766	3258	3757	3768	3788	3738	3231	3325	3575	3531
A. indicus CIP 110367	2911	2615	2962	2901	2327	2981	2222	3022	2778	3001	2769	3056	2381	2398	2898	0	3134	2860	3766		2895	2888	0	2960	184	210	2988	293	2902	2965	2388	2676
A. brisouii CIP 110357	2686	2855	2924	2931	3095	2897	2867	2860	3279	3103	2879	2881	2814	3085	2698	2895	3114	2798	3306	2895		2664	2895	2747	2899	2916	3205	2924	2692	2817	2908	3110
A. baumannii AYE	119	2895	2519	2679	3037	2621	2801	2658	3325	3001	2795	2405	2757	3121	117	2888	2944	2298	3210	2888	2664		2888	1206	2890	2892	3258	2887	104	2251	2840	2943
A. indicus DSM 25388	2911	2615	2962	2901	2327	2981	2222	3022	2778	3001	2769	3056	2381	2398	2898	0	3134	2860	3766	0	2895	2888		2960	184	210	2988	293	2902	2965	2388	2676
A. pittii BBST01.1	1233	2908	2495	2723	3105	2586	2878	2639	3337	2993	2780	2379	2756	3146	1230	2960	2990	2261	3258	2960	2747	1206	2960		2958	2963	3271	2950	1227	2237	2837	2959
A. indicus IHIT27599	2918	2634	2954	2913	2343	2994	2235	3002	2810	3005	2781	3045	2394	2411	2904	184	3138	2858	3757	184	2899	2890	184	2958		74	2990	301	2912	2952	2417	2675
A. indicus IHIT27630	2920	2631	2954	2923	2341	3011	2223	3025	2803	3019	2792	3051	2403	2408	2908	210	3156	2856	3768	210	2916	2892	210	2963	74		2985	329	2914	2966	2410	2679
A. harbinensis HITLi7	3294	2019	3378	3162	3112	3387	2851	3311	3132	3405	2957	3229	2899	2808	3269	2988	3313	3152	3788	2988	3205	3258	2988	3271	2990	2985		2994	3275	3235	2688	3044
A. indicus KM7	2917	2636	2965	2930	2317	2987	2240	3019	2784	2964	2791	3056	2411	2407	2901	293	3131	2882	3738	293	2924	2887	293	2950	301	329	2994		2903	2970	2405	2684
A. baumannii MDR-TJ	80	2918	2531	2695	3057	2632	2820	2669	3336	3021	2817	2419	2768	3149	87	2902	2967	2309	3231	2902	2692	104	2902	1227	2912	2914	3275	2903		2258	2852	2960
A. venetianus VE-C3	2267	2857	1825	2808	3096	2792	2790	2755	3376	3144	2824	1710	2690	3114	2271	2965	3004	1414	3325	2965	2817	2251	2965	2237	2952	2966	3235	2970	2258		2766	2929
A. johnsonnii XBB1	2860	2214	2913	2744	2357	3145	2310	3056	2463	3171	2474	2840	2147	2356	2855	2388	3049	2659	3575	2388	2908	2840	2388	2837	2417	2410	2688	2405	2852	2766		2534
A. equi strain 114	2977	2657	3225	2851	2602	3321	2554	3290	2951	3376	2617	2984	2513	2689	2964	2676	3154	2962	3531	2676	3110	2943	2676	2959	2675	2679	3044	2684	2960	2929	2534
	Colour shading indicates SNP values (low number of SNPs [dark green] to high number of SNPs [white])

## Sheet: SNP_matrix B Figure S1B
Klotz et al.: "Carbapenem-resistance and pathogenicity of bovine Acinetobacter indicus-like isolates"
S2 (B) Table: SNP matrix referrin to S1 (B) Fig
Strains (see S1 Fig for accession numbers)	A. indicus ANC 4215	A. indicus CIP 110367	A. indicus DSM 25388	A. indicus IHIT27599	A. indicus IHIT27630	A. indicus KM7
A. indicus ANC 4215		313	1618	65952	68658	83046
A. indicus CIP 110367	313		1917	66012	68544	82736
A. indicus DSM 25388	1618	1917		64841	67605	81906
A. indicus IHIT27599	65952	66012	64841		35396	83474
A. indicus IHIT27630	68658	68544	67605	35396		86573
A. indicus KM7	83046	82736	81906	83474	86573
	Colour shading indicates SNP values (low number of SNPs [dark green] to high number of SNPs [white])
