# Supplementary material for: Carbapenem-resistance and pathogenicity of bovine Acinetobacter indicus-like isolates
Source: PLoS One. 2017 Feb 16;12(2):e0171986. doi: 10.1371/journal.pone.0171986 (PMC5313175; doi:10.1371/journal.pone.0171986)
Supplement: S4 Table — (XLSX) [file pone.0171986.s004.xlsx]

## Sheet: Tabelle1
LDH Assay Statistics
2016-11-24
LDH values/ tests	A. baumannii ATCC 17978	medium	A. lwoffii ATCC 15309	A. indicus-like IHIT27630	A. indicus-like IHIT27599
1	106.5	9	33	12	22
2	111	21	27	16	20
3	79.5	15	22.5	34.5	50
4	126	22	37.5	36	40
5	85.5	14	22.5	15	14
6	91.5	18	24	19.5	11
7	x	15	x	x	38
	100	16.2857	27.75	22.1667	27.8571	MW
	Medium vs			ACBA vs
	ACBA	9.4595e-08		15309	2.53293e-06
	15309	0.00260614		IHIT27630	2.97411e-06
	IHIT27630	0.200494		IHIT27599	6.16231e-06
	IHIT27599	0.0709155
	two-tailed unpaired t-test
	* <0.05
	***<0.001
